# Supplementary material
Source: publisher figshare collection journal article supplement (https://sage.figshare.com/ndownloader/files/21943749)
Supplement: Supplementary file 1 [file 21943749]

e-Figure1: **ROC curve for the monocyte count**

e-Figure2: **Incidence of AE among patients with IPF**

e-Figure3: **Incidence of AE among non-IPF patients**
